# Supplementary material
Source: publisher figshare collection journal article supplement (https://plos.figshare.com/articles/dataset/_/1063956)
Supplement: Supplementary file [file 1]

**Table S2** Characteristics of the patients (samples were used for *ex vivo* functional analysis of peripheral blood iNKT cells)

| Patients                   | Age | Gender | Serotype | WBC <sup>A</sup> | Hct <sup>B</sup> | Platelet <sup>C</sup> | AST <sup>D</sup> | ALT <sup>E</sup> | Albumin <sup>F</sup> |
|----------------------------|-----|--------|----------|------------------|------------------|-----------------------|------------------|------------------|----------------------|
| DF3                        | 15  | M      | DV2      | 2.7              | 42.7             | 78.0                  | 26.0             | 29.0             | 4.0                  |
| DF6                        | 9   | F      | DV3      | 2.3              | 35.0             | 87.0                  | 107.0            | 59.0             | 7.1                  |
| DF7                        | 14  | M      | DV2      | 3.6              | 39.0             | 55.0                  | 96.0             | 39.0             | 3.7                  |
| DF12                       | 14  | M      | DV3      | 1.5              | 43.6             | 25.0                  | 169.0            | 76.0             | 2.7                  |
| DF13                       | 10  | M      | DV1      | 3.8              | 37.0             | 116.0                 | 92.0             | 80.0             | 3.2                  |
| DF14                       | 11  | M      | DV1      | 2.1              | 39.0             | 54.0                  | 162.0            | 116.0            | 2.7                  |
| DF15                       |     | M      | DV2      | 4.0              | 38.0             | 84.0                  | 96.0             | 71.0             | 3.9                  |
| DF16                       | 11  | M      | DV1      | 6.0              | 38.0             | 123.0                 | 95.0             | 63.0             | 3.2                  |
| DF17                       | 13  | M      | DV3      | 3.7              | 41.8             | 119.0                 | 32.0             | 24.0             | 3.6                  |
| DF18                       | 9   | F      | DV1      | 2.0              | 39.0             | 51.0                  | 178.0            | 73.0             | 3.3                  |
| DF19                       | 11  | F      | DV1      | 3.8              | 37.0             | 134.0                 | 66.0             | 43.0             | 3.5                  |
| DF20                       | 11  | F      | DV1      | 2.9              | 39.0             | 61.0                  | 68.0             | 42.0             | 3.3                  |
| DF21                       | 14  | F      | DV1      | 2.5              | 36.0             | 71.0                  | 475.0            | 259.0            | 3.4                  |
| DF22                       | 13  | F      | DV1      | 3.0              | 40.0             | 55.0                  | 194.0            | 89.0             | 2.8                  |
| <b>Average</b>             | 12  | M8:F6  | 8:3:3:0  | 3.1              | 38.9             | 79.5                  | 132.6            | 75.9             | 3.6                  |
| <b>SD</b>                  | 1.9 |        |          | 1.1              | 2.5              | 32.7                  | 111.5            | 58.4             | 1.1                  |
| DHF6                       | 12  | M      | DV3      | 1.7              | 33.5             | 36.0                  | 1119.0           | 363.0            | 2.3                  |
| DHF8                       | 10  | F      | DV3      | 3.9              | 44.0             | 31.0                  | 288.0            | 102.0            | 2.5                  |
| DHF10                      | 13  | M      | DV2      | 4.1              | 34.0             | 25.0                  | 671.0            | 274.0            | 2.9                  |
| DHF11                      | 15  | M      | DV2      | 2.2              | 48.9             | 14.0                  | 113.0            | 59.0             | 3.2                  |
| DHF14                      | 14  | F      | DV1      | 2.6              | 38.0             | 60.0                  | 157.0            | 61.0             | 2.9                  |
| DHF15                      | 10  | F      | DV1      | 2.6              | 44.0             | 41.0                  | 105.0            | 68.0             | 2.2                  |
| DHF17                      | 7   | F      | DV3      | 2.8              | 40.0             | 25.0                  | 131.0            | 55.0             | 2.4                  |
| DHF20                      | 12  | M      | DV2      | 1.4              | 39.8             | 16.0                  | 201.0            | 123.0            | 1.6                  |
| DHF21                      | 13  | M      | DV2      | 2.4              | 46.6             | 14.0                  | 205.0            | 136.0            | 2.4                  |
| DHF22                      | 2   | M      | DV1      | 1.9              | 38.0             | 8.0                   | 130.0            | 52.0             | 4.0                  |
| DHF23                      | 13  | F      | DV1      | 2.1              | 47.0             | 22.0                  | 137.0            | 67.0             | 2.9                  |
| DHF24                      | 12  | M      | DV1      | 4.1              | 33.0             | 51.0                  | 137.0            | 28.0             | 3.3                  |
| <b>Average</b>             | 11  | M7:F5  | 5:4:3:0  | 2.7              | 40.6             | 28.6                  | 282.8            | 115.7            | 2.7                  |
| <b>SD</b>                  | 3.4 |        |          | 0.9              | 5.5              | 15.9                  | 305.7            | 101.4            | 0.6                  |
| <b>P-value (DF vs DHF)</b> |     |        |          | 0.3544           | 0.4088           | ***0.0002             | *0.0221          | 0.3545           | **0.0074             |

<sup>A</sup>lowest white blood cell count, <sup>B</sup>highest hematocrit, <sup>C</sup>lowest platelet, <sup>D</sup>highest serum aspartate transaminase,<sup>E</sup>highest serum alanine transaminase, <sup>F</sup>lowest serum albumin
