# Supplementary material
Source: publisher figshare collection journal article supplement (https://plos.figshare.com/articles/dataset/_/1063956)
Supplement: Supplementary file [file 1]

**Table S1** Characteristics of the patients (samples used for phenotypic analysis of peripheral blood iNKT cells)

| Patients            | Age | Gender | Serotype | WBC <sup>A</sup> | Hct <sup>B</sup> | Platelet <sup>C</sup> | AST <sup>D</sup> | ALT <sup>E</sup> | Albumin <sup>F</sup> |
|---------------------|-----|--------|----------|------------------|------------------|-----------------------|------------------|------------------|----------------------|
| DF1                 | 10  | F      | DV2      | 4.0              | 39.0             | 65.0                  | 42.0             | 40.0             | 3.1                  |
| DF2                 | 7   | F      | DV1      | 2.2              | 37.0             | 86.0                  | 26.0             | 28.0             | 4.0                  |
| DF3                 | 15  | M      | DV2      | 2.7              | 42.7             | 78.0                  | 26.0             | 29.0             | 4.0                  |
| DF4                 | 13  | M      | DV2      | 2.1              | 37.3             | 77.0                  | 73.0             | 54.0             | 3.3                  |
| DF5                 | 11  | F      | DV3      | 2.1              | 36.0             | 77.0                  | 67.0             | 34.0             | 6.7                  |
| DF6                 | 9   | F      | DV3      | 2.3              | 35.0             | 87.0                  | 107.0            | 59.0             | 7.1                  |
| DF7                 | 14  | M      | DV2      | 3.6              | 39.0             | 55.0                  | 96.0             | 39.0             | 3.7                  |
| DF8                 | 9   | M      | DV1      | 3.2              | 40.0             | 120.0                 | 30.0             | 30.0             | 3.3                  |
| DF9                 | 9   | M      | DV3      | 1.9              | 38.9             | 80.0                  | 118.0            | 137.0            | 2.7                  |
| DF10                | 9   | F      | DV1      | 2.1              | 37.4             | 59.0                  | 118.0            | 137.0            | 3.0                  |
| DF11                | 14  | F      | DV1      | 1.1              | 36.5             | 66.0                  | 64.0             | 48.0             | 3.1                  |
| Average             | 11  | M5:F6  | 4:4:3:0  | 2.5              | 38.1             | 77.3                  | 69.7             | 57.7             | 4.0                  |
| SD                  | 2.6 |        |          | 0.8              | 2.1              | 17.6                  | 36.0             | 40.5             | 1.5                  |
| DHF1                | 11  | F      | DV4      | 2.6              | 38.0             | 23.0                  | 164.0            | 71.0             | 3.0                  |
| DHF2                | 8   | F      | DV4      | 1.9              | 36.0             | 14.0                  | 125.0            | 57.0             | 2.2                  |
| DHF3                | 13  | F      | DV4      | 2.7              | 41.0             | 38.0                  | 452.0            | 198.0            | 2.6                  |
| DHF4                | 8   | M      | DV1      | 1.8              | 38.0             | 142.0                 | 76.0             | 47.0             | 3.8                  |
| DHF5                | 12  | F      | DV3      | 1.9              | 41.0             | 12.0                  | 182.0            | 43.0             | 2.7                  |
| DHF6                | 12  | M      | DV3      | 1.7              | 33.5             | 36.0                  | 1119.0           | 363.0            | 2.3                  |
| DHF7                | 11  | M      | DV2      | 2.5              | 40.5             | 50.0                  | 150.0            | 93.0             | 3.4                  |
| DHF8                | 10  | F      | DV3      | 3.9              | 44.0             | 31.0                  | 288.0            | 102.0            | 2.5                  |
| DHF9                | 8   | M      | DV2      | 2.6              | 42.0             | 63.0                  | 83.0             | 40.0             | 3.3                  |
| DHF10               | 13  | M      | DV2      | 4.1              | 34.0             | 25.0                  | 671.0            | 274.0            | 2.9                  |
| DHF11               | 15  | M      | DV2      | 2.2              | 48.9             | 14.0                  | 113.0            | 59.0             | 3.2                  |
| DHF12               | 12  | F      | DV1      | 1.9              | 41.0             | 12.0                  | 182.0            | 43.0             | 2.7                  |
| DHF13               | 9   | M      | DV3      | 3                | 40.0             | 17.0                  | 409.0            | 284.0            | 2.6                  |
| DHF14               | 14  | F      | DV1      | 2.6              | 38.0             | 60.0                  | 157.0            | 61.0             | 2.9                  |
| DHF15               | 10  | F      | DV1      | 2.6              | 44.0             | 41.0                  | 105.0            | 68.0             | 2.2                  |
| DHF16               | 7   | F      | DV2      | 1.9              | 41.0             | 24.0                  | 101.0            | 35.0             | 2.6                  |
| DHF17               | 7   | F      | DV3      | 2.8              | 40.0             | 25.0                  | 131.0            | 55.0             | 2.4                  |
| DHF18               | 10  | F      | DV1      | 2.2              | 42.0             | 9.0                   | 106.0            | 30.0             | 3.0                  |
| DHF19               | 13  | F      | DV1      | 1.2              | 36.4             | 98.0                  | 75.0             | 60.0             | 3.5                  |
| Average             | 11  | M7:F12 | 6:5:5:3  | 2.4              | 40.0             | 38.6                  | 246.8            | 104.4            | 2.8                  |
| SD                  | 2.4 |        |          | 0.7              | 3.7              | 33.6                  | 262.1            | 98.6             | 0.5                  |
| P-value (DF vs DHF) |     |        |          | 0.8459           | 0.0973           | ***0.0007             | ***0.0005        | *0.0408          | **0.0026             |

<sup>A</sup>lowest white blood cell count, <sup>B</sup>highest hematocrit, <sup>C</sup>lowest platelet, <sup>D</sup>highest serum aspartate transaminase,<sup>E</sup>highest serum alanine transaminase, <sup>F</sup>lowest serum albumin
